# Supplementary material for: Economic impact and policy implications from urban shared transportation: The case of Pittsburgh’s shared bike system
Source: PLOS journal article supplement (doi:10.1371/journal.pone.0184092), 2017-08-31
Supplement: S1 (10.1371/journal.pone.0184092.s001) [file journal.pone.0184092.s001]

**S1 Text. Demographic Information.** In the following tables we present the median age and income for each of the treated zip codes in the city of Pittsburgh. We also provide their classification based on ESRI’s tapestry system (<http://www.esri.com/landing-pages/tapestry>). Tapestry classifies US zip codes into 67 distinct segments based on demographics and socioeconomic characteristics. This tapestry label fuses several information beyond just age and income. While some zip codes might be assigned several (weighted) labels, we report the top one for each zipcode. More detailed information can be obtained at: [http://www.esri.com/data/esri\\_data/ziptapestry](http://www.esri.com/data/esri_data/ziptapestry), where the interested reader can see an interactive map.

| Zip Code | Median Age | Median Income (\$) | ESRI Tapestry                            |
|----------|------------|--------------------|------------------------------------------|
| 15206    | 37.9       | 35K                | Modest Income Homes                      |
| 15203    | 30.4       | 38K                | College Towns                            |
| 15214    | 39.2       | 38K                | Rustbelt Traditions                      |
| 15212    | 40.3       | 35K                | Set to Impress                           |
| 15213    | 23.5       | 20K                | College Towns                            |
| 15219    | 25.9       | 18K                | Social Security Set                      |
| 15222    | 32.3       | 45K                | Metro Renters                            |
| 15232    | 29.2       | 47K                | Metro Renters                            |
| 15233    | 37.9       | 30K                | Old & Newcomers                          |
| 15224    | 35.2       | 29K                | Set to Impress                           |
| 15201    | 39.2       | 35K                | Set to Impress                           |
| 15260    | 19         | 33K                | Retirement Community & Dorms to Diplomas |

Table 1: Demographics for the treated zip codes in the city of Pittsburgh. Rows in blue font are those for which we do not have Zillow data for.

We further present in Table 2 the demographic information for the different metro areas used in our analysis. These data were obtained from [www.city-data.com](http://www.city-data.com), which compiles data from several government resources.

| City           | Median Age | Median Income (\$) | Population |
|----------------|------------|--------------------|------------|
| Allentown, PA  | 32.7       | 37K                | 119,104    |
| Baltimore, MD  | 34.7       | 44K                | 622,793    |
| Buffalo, NY    | 33.1       | 33K                | 258,703    |
| Cincinnati, OH | 32.7       | 35K                | 298,165    |
| Cleveland, OH  | 36         | 29K                | 389,521    |
| Harrisburg, PA | 32.8       | 34K                | 49,082     |
| Rochester, NY  | 31.4       | 32K                | 209,983    |
| Youngstown, OH | 37.5       | 24K                | 65,062     |
| Pittsburgh, PA | 32.9       | 41K                | 305,412    |

Table 2: Demographics for the cities we used for comparison.
